# Supplementary material
Source: PubMed Central journal article supplement (PMC4344932)
Supplement: NIHMS626572-supplement-supplement_1.pdf [file NIHMS626572-supplement-supplement_1.pdf]

Supplementary Appendix S1. Percentage of participants with scores on externalizing problems at different numbers of time points.

| Number of<br>Time Points | Participants with Scores on<br>Externalizing Problems (%) |
|--------------------------|-----------------------------------------------------------|
| 0                        | 0.2                                                       |
| 1                        | 1.4                                                       |
| 2                        | 1.2                                                       |
| 3                        | 0.2                                                       |
| 4                        | 1.4                                                       |
| 5                        | 1.5                                                       |
| 6                        | 1.0                                                       |
| 7                        | 1.9                                                       |
| 8                        | 2.1                                                       |
| 9                        | 2.9                                                       |
| 10                       | 2.4                                                       |
| 11                       | 1.2                                                       |
| 12                       | 2.2                                                       |
| 13                       | 2.2                                                       |
| 14                       | 2.4                                                       |
| 15                       | 2.9                                                       |
| 16                       | 4.3                                                       |
| 17                       | 5.3                                                       |
| 18                       | 9.2                                                       |
| 19                       | 17.6                                                      |
| 20                       | 36.6                                                      |

Supplementary Appendix S2. Correlation matrix of predictors (and means and standard deviations).

[illegible]

Supplementary Appendix S2 - (Continued)

[illegible]

Note: Significant correlations ( $p < .05$ ) in bold. TI = time-invariant, EC = early childhood, MC = middle childhood, EA = earlier adolescence, LA = later adolescence, AD = adulthood
